# Supplementary material
Source: ML conference proceedings conference paper supplement (https://openreview.net/forum?id=9r3OQhPiqT)

Training Accuracy

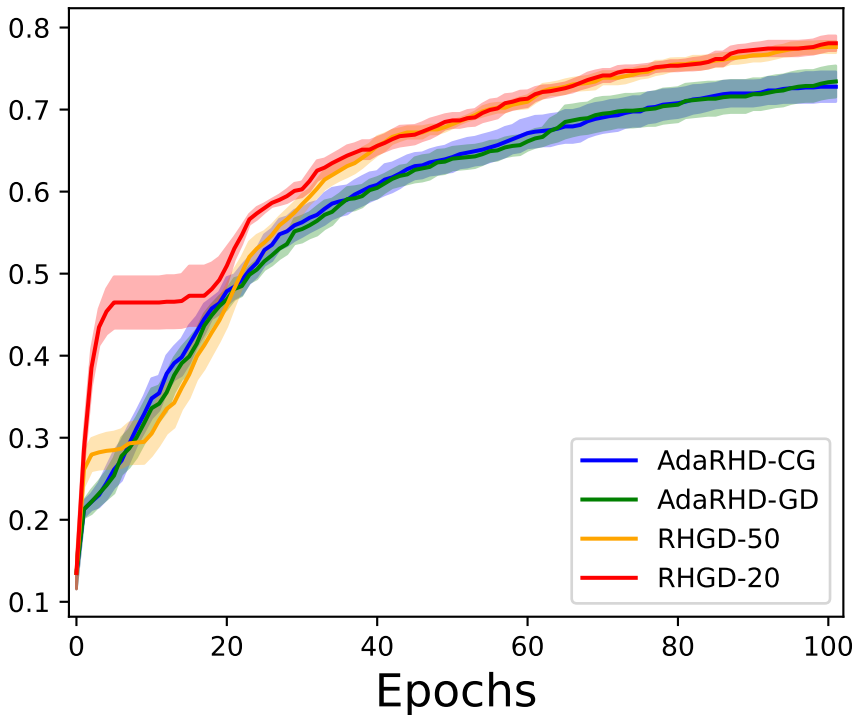

Supplement: supplementary_material [file dataratio0.125_deep_hyrep_spd_acc.pdf › AdaRHD-main/fig/dataratio0.125_deep_hyrep_spd_acc.pdf]

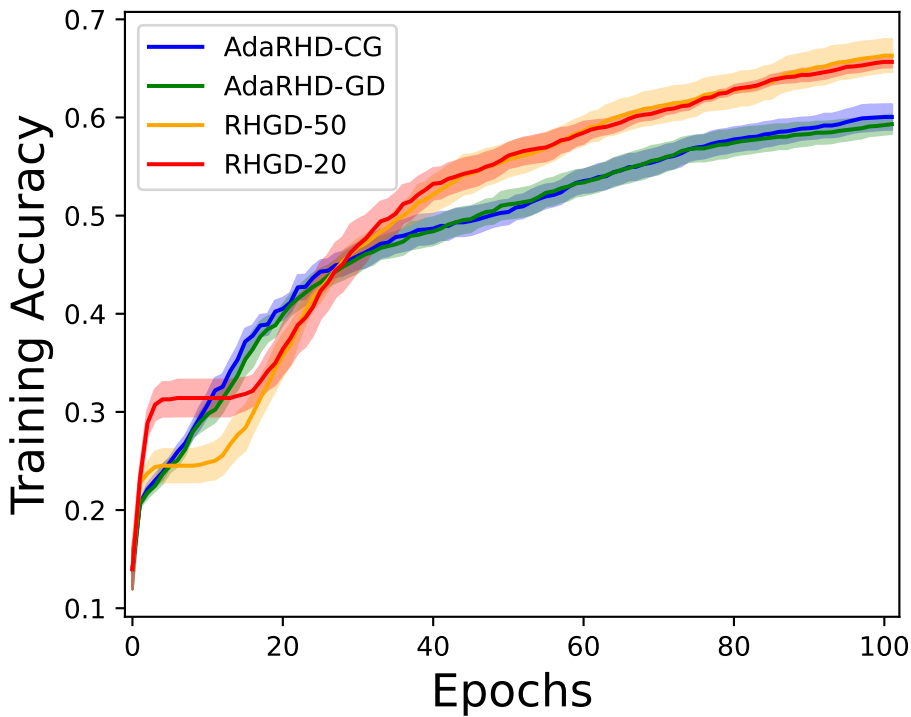

Supplement: supplementary_material [file dataratio0.25_deep_hyrep_spd_acc.pdf › AdaRHD-main/fig/dataratio0.25_deep_hyrep_spd_acc.pdf]

Hypergradient Norm

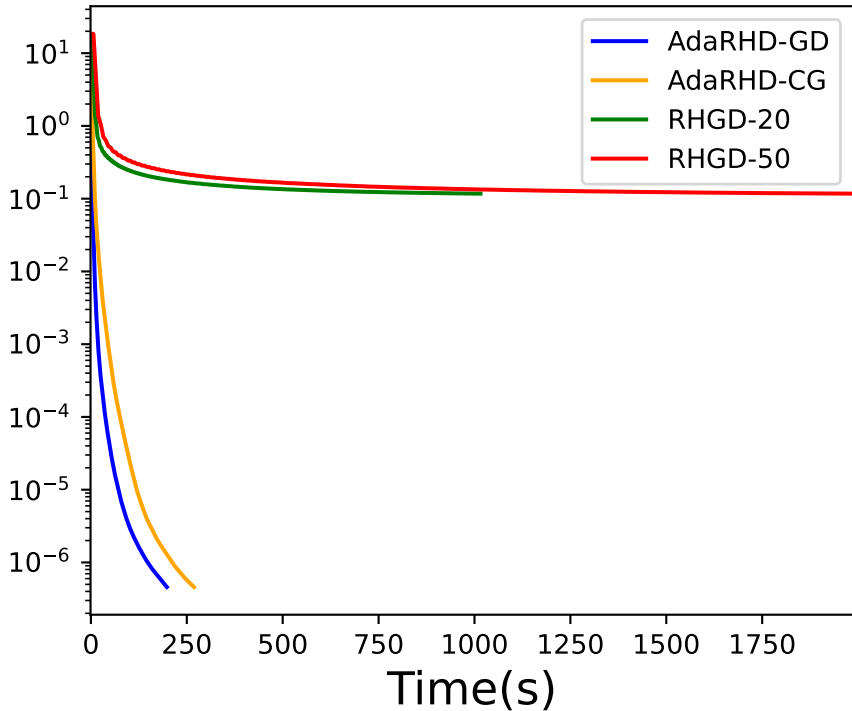

Supplement: supplementary_material [file robust_KM_n10d20_timeVSgradnorms.pdf › AdaRHD-main/fig/robust_KM_n10d20_timeVSgradnorms.pdf]

Hypergradient Norm

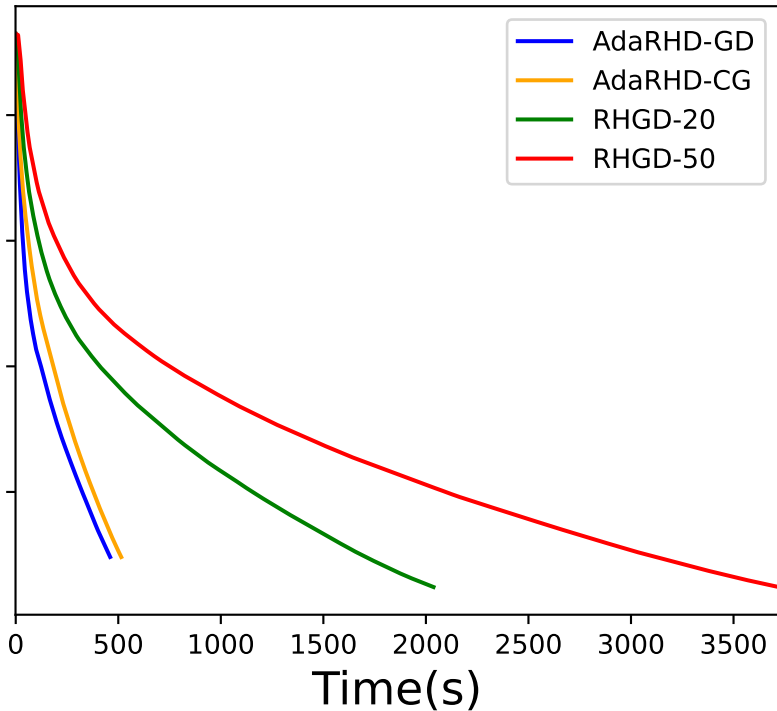

Supplement: supplementary_material [file robust_KM_n20d20_timeVSgradnorms.pdf › AdaRHD-main/fig/robust_KM_n20d20_timeVSgradnorms.pdf]

Hypergradient Norm

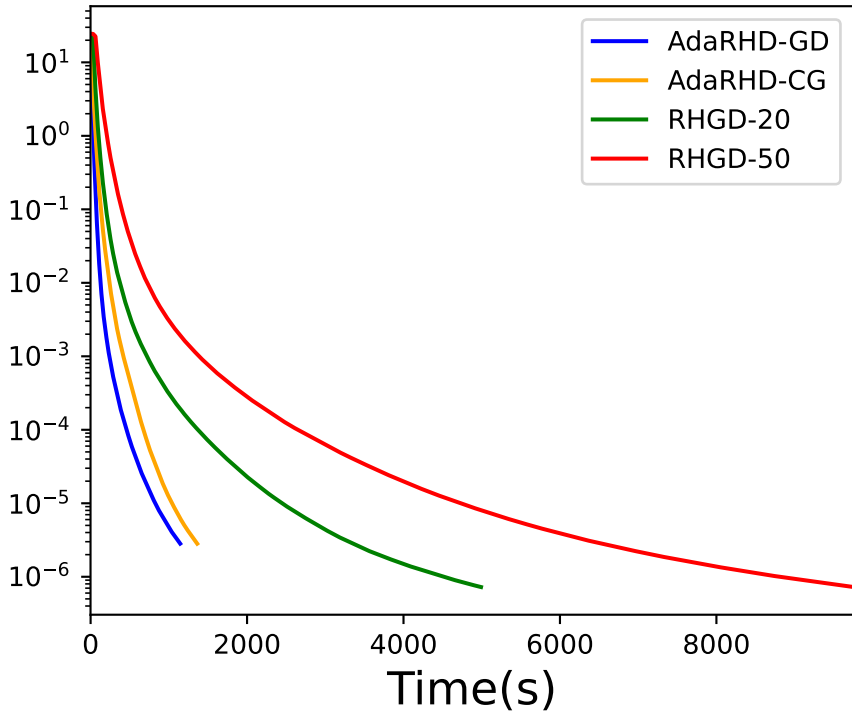

Supplement: supplementary_material [file robust_KM_n50d20_timeVSgradnorms.pdf › AdaRHD-main/fig/robust_KM_n50d20_timeVSgradnorms.pdf]

Hypergradient Norm

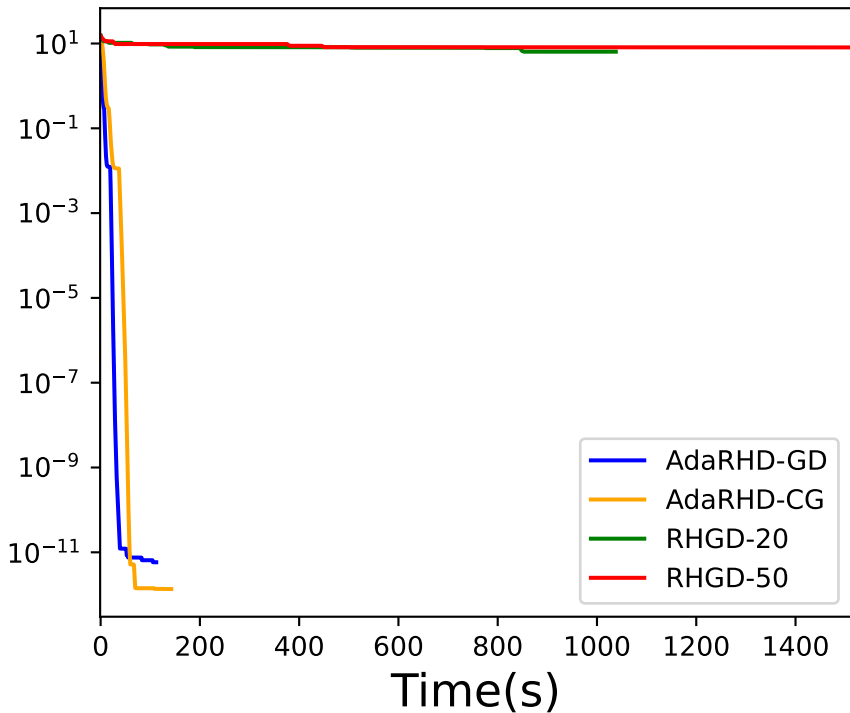

Supplement: supplementary_material [file robust_KM_n5d20_timeVSgradnorms.pdf › AdaRHD-main/fig/robust_KM_n5d20_timeVSgradnorms.pdf]

Validation Accuracy

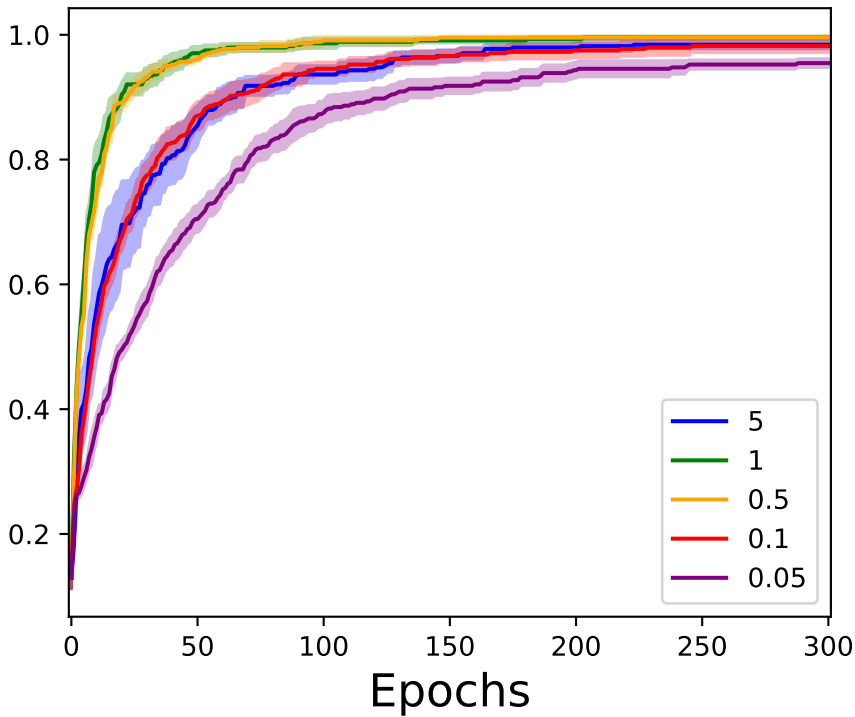

Supplement: supplementary_material [file robust_dataratio0.05_deep_hyrep_spd_acc_AdaRHD_cg_bestiter.pdf › AdaRHD-main/fig/robust_dataratio0.05_deep_hyrep_spd_acc_AdaRHD_cg_bestiter.pdf]

Validation Accuracy

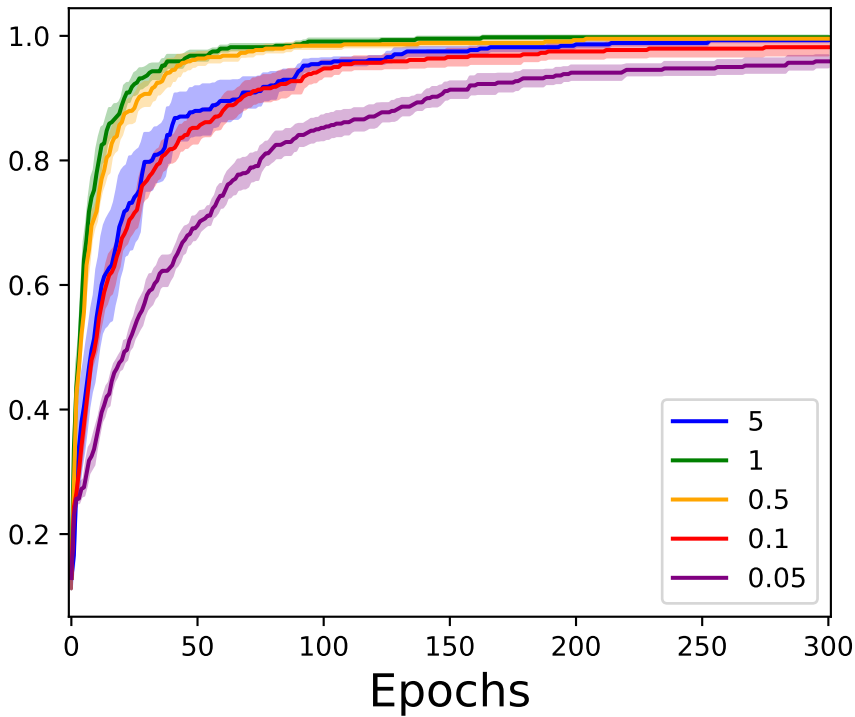

Supplement: supplementary_material [file robust_dataratio0.05_deep_hyrep_spd_acc_AdaRHD_gd_bestiter.pdf › AdaRHD-main/fig/robust_dataratio0.05_deep_hyrep_spd_acc_AdaRHD_gd_bestiter.pdf]

Validation Accuracy

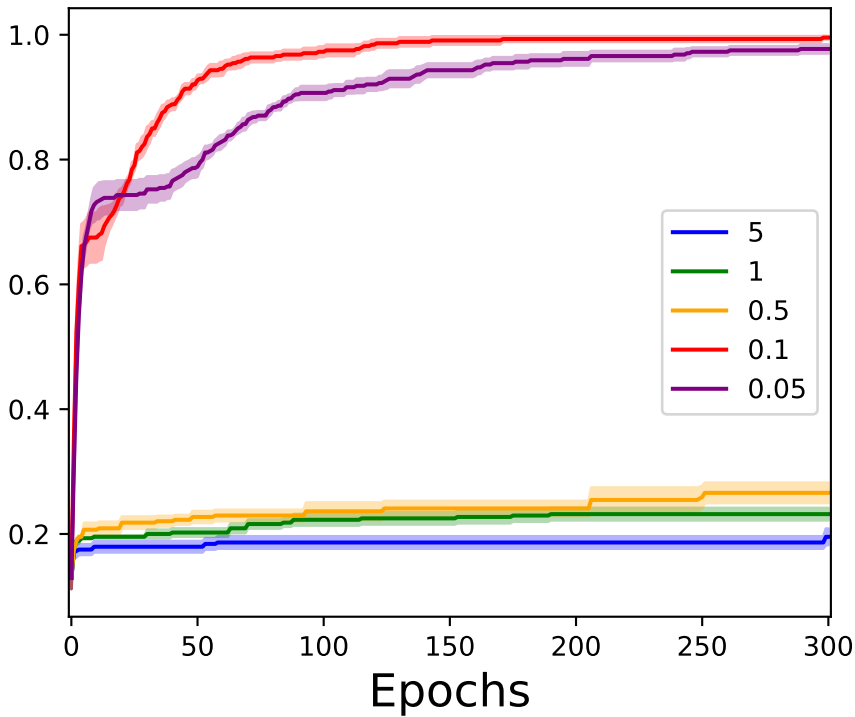

Supplement: supplementary_material [file robust_dataratio0.05_deep_hyrep_spd_acc_RHGD_20_bestiter.pdf › AdaRHD-main/fig/robust_dataratio0.05_deep_hyrep_spd_acc_RHGD_20_bestiter.pdf]

Validation Accuracy

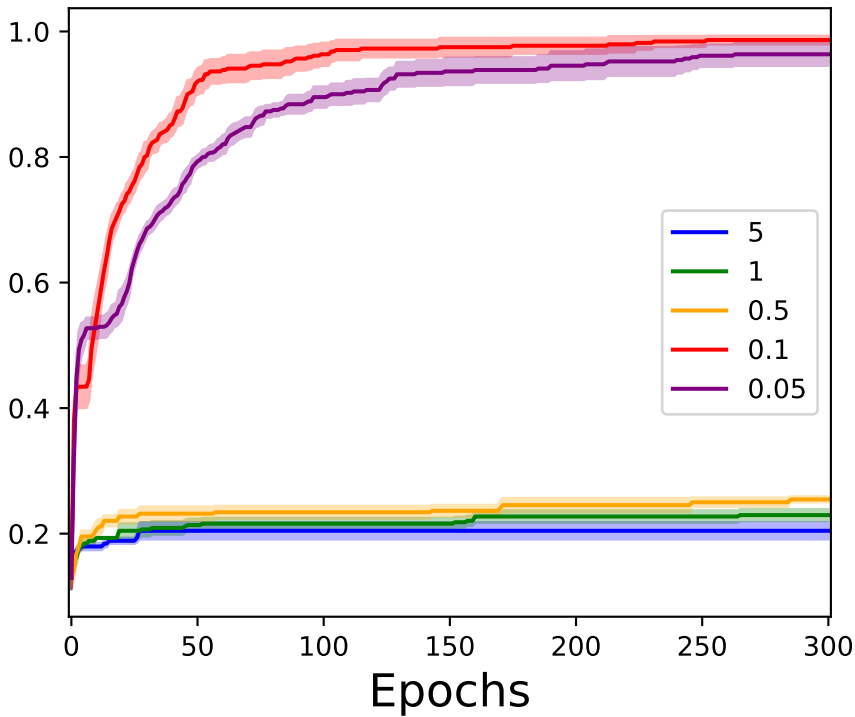

Supplement: supplementary_material [file robust_dataratio0.05_deep_hyrep_spd_acc_RHGD_50_bestiter.pdf › AdaRHD-main/fig/robust_dataratio0.05_deep_hyrep_spd_acc_RHGD_50_bestiter.pdf]

Hypergrad Norm

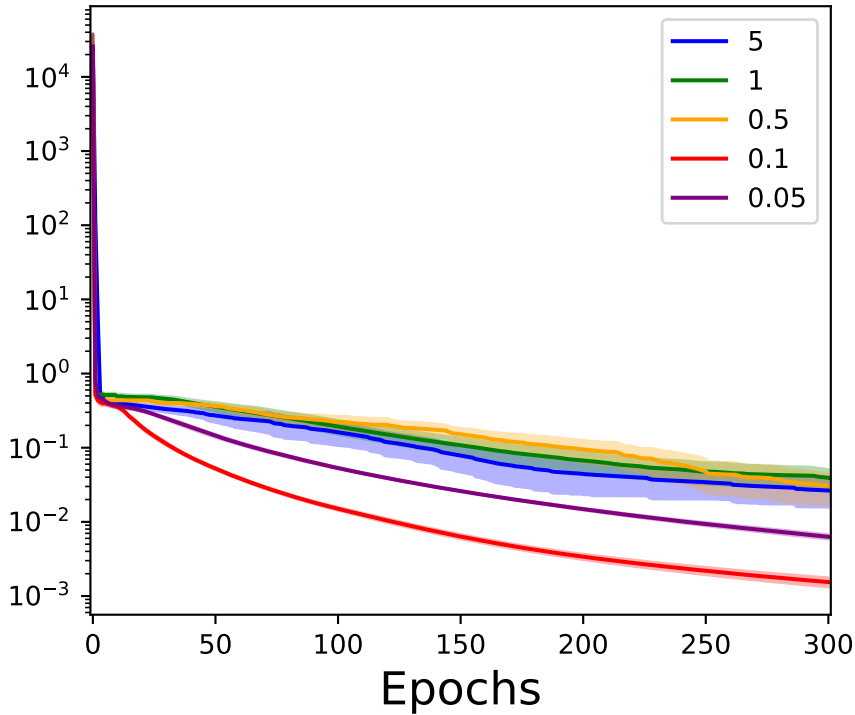

Supplement: supplementary_material [file robust_dataratio0.05_deep_hyrep_spd_gradnorm_AdaRHD_cg_bestiter.pdf › AdaRHD-main/fig/robust_dataratio0.05_deep_hyrep_spd_gradnorm_AdaRHD_cg_bestiter.pdf]

Hypergrad Norm

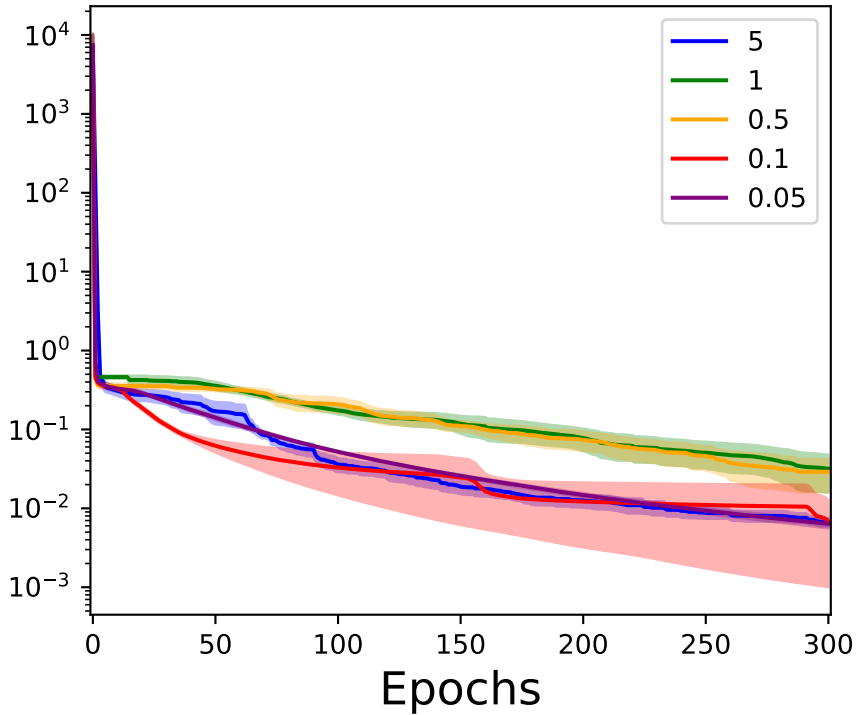

Supplement: supplementary_material [file robust_dataratio0.05_deep_hyrep_spd_gradnorm_AdaRHD_gd_bestiter.pdf › AdaRHD-main/fig/robust_dataratio0.05_deep_hyrep_spd_gradnorm_AdaRHD_gd_bestiter.pdf]

Hypergrad Norm

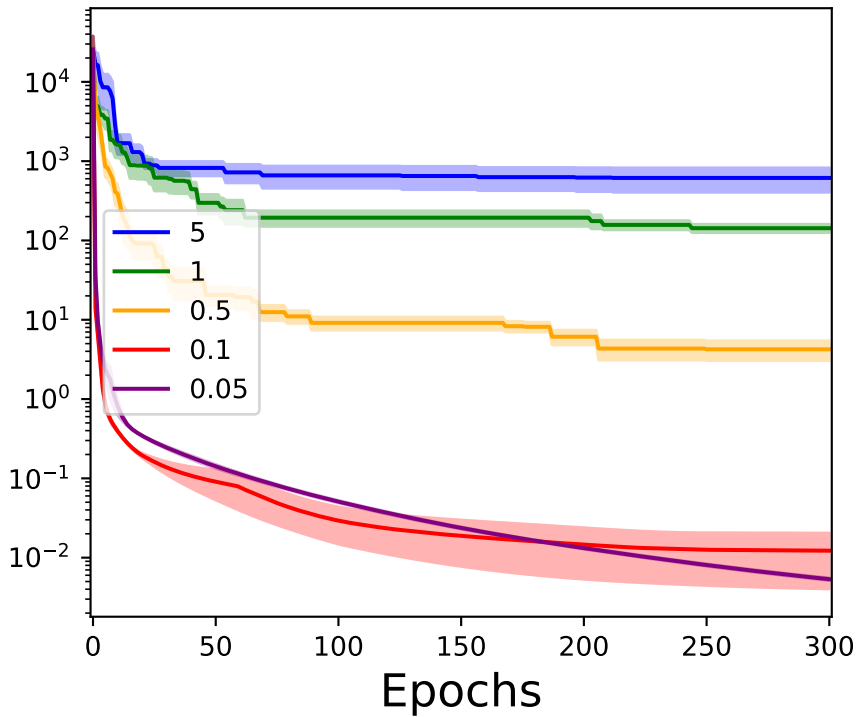

Supplement: supplementary_material [file robust_dataratio0.05_deep_hyrep_spd_gradnorm_RHGD_20_bestiter.pdf › AdaRHD-main/fig/robust_dataratio0.05_deep_hyrep_spd_gradnorm_RHGD_20_bestiter.pdf]

Hypergrad Norm

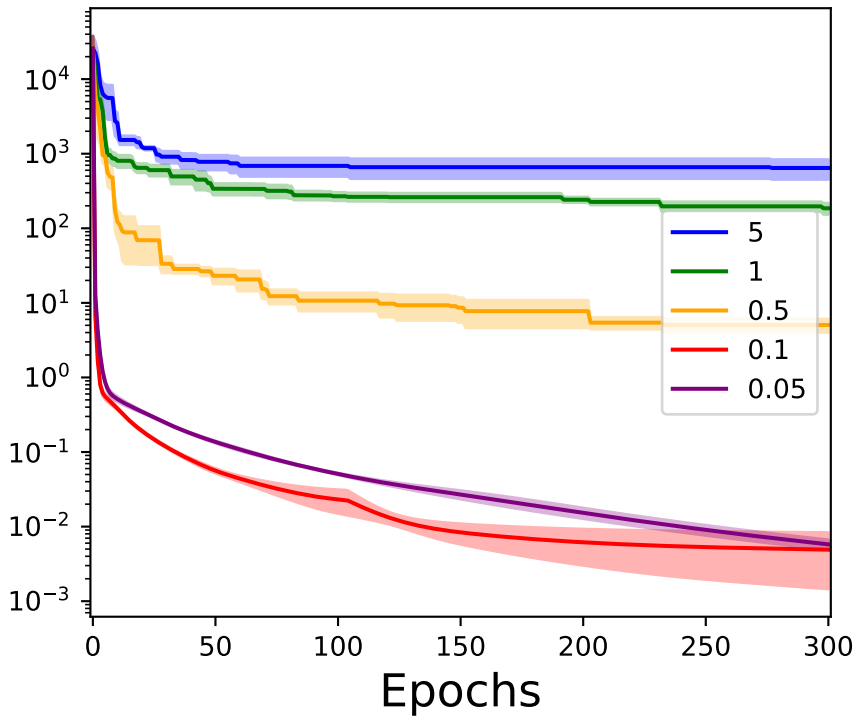

Supplement: supplementary_material [file robust_dataratio0.05_deep_hyrep_spd_gradnorm_RHGD_50_bestiter.pdf › AdaRHD-main/fig/robust_dataratio0.05_deep_hyrep_spd_gradnorm_RHGD_50_bestiter.pdf]

Hypergradient Norm

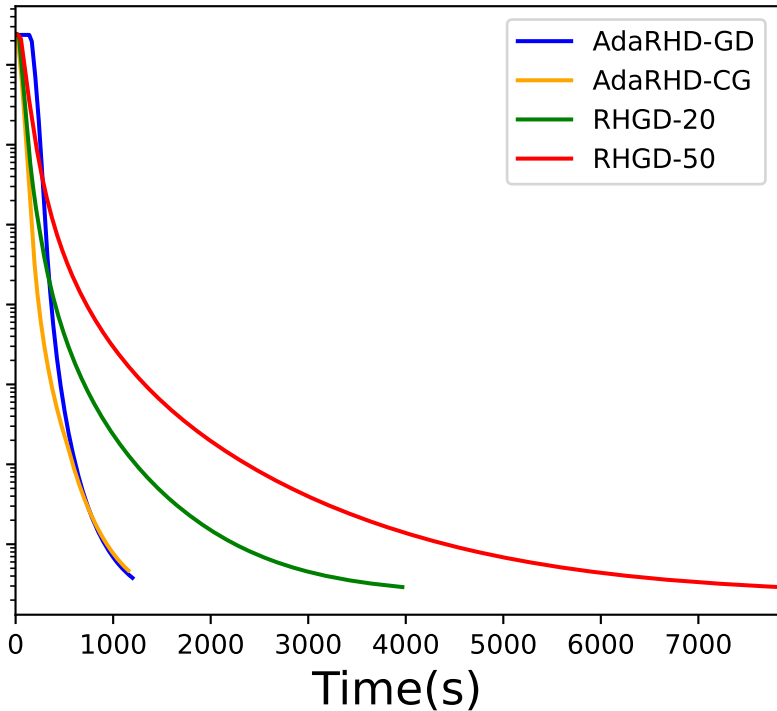

Supplement: supplementary_material [file robust_mle_n1000d50_timeVSgradnorms.pdf › AdaRHD-main/fig/robust_mle_n1000d50_timeVSgradnorms.pdf]

Hypergradient Norm

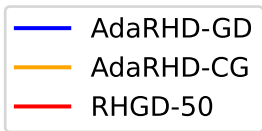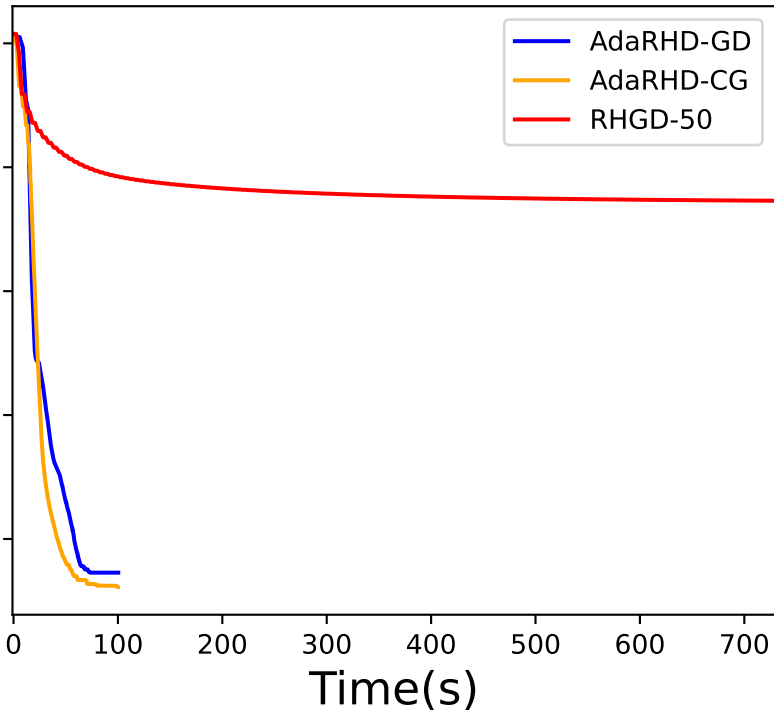

Supplement: supplementary_material [file robust_mle_n100d50_timeVSgradnorms.pdf › AdaRHD-main/fig/robust_mle_n100d50_timeVSgradnorms.pdf]

Hypergradient Norm

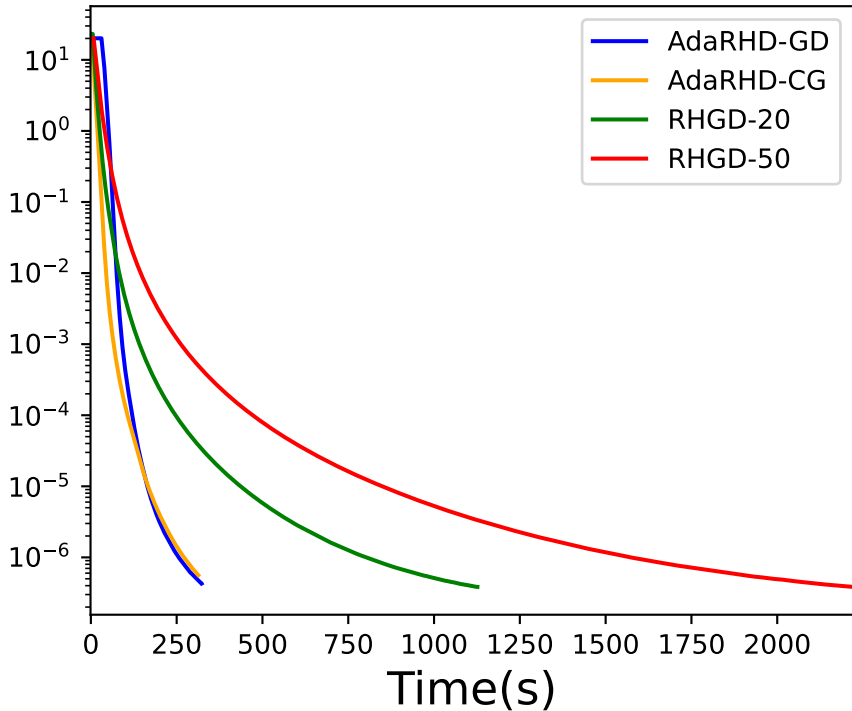

Supplement: supplementary_material [file robust_mle_n300d50_timeVSgradnorms.pdf › AdaRHD-main/fig/robust_mle_n300d50_timeVSgradnorms.pdf]

Hypergradient Norm

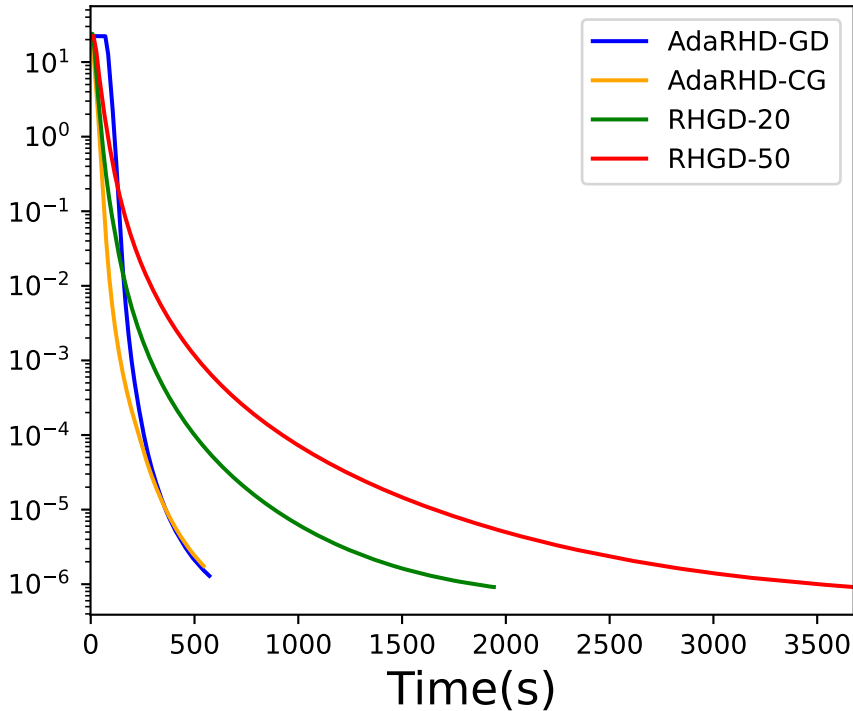

Supplement: supplementary_material [file robust_mle_n500d50_timeVSgradnorms.pdf › AdaRHD-main/fig/robust_mle_n500d50_timeVSgradnorms.pdf]

Hypergrad error

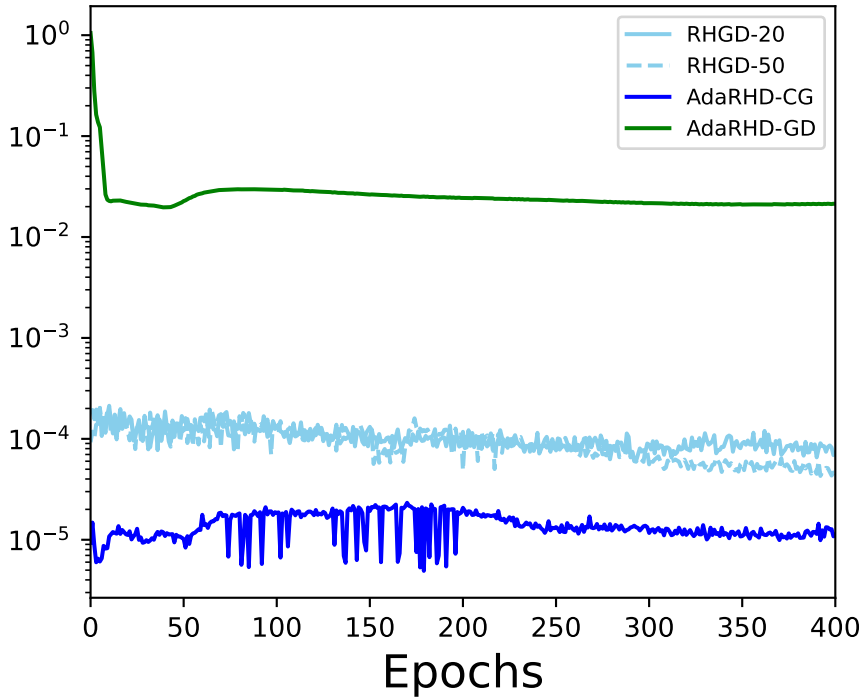

Supplement: supplementary_material [file shallow_hyrep_1000_50_10_hypergrad_error.pdf › AdaRHD-main/fig/shallow_hyrep_1000_50_10_hypergrad_error.pdf]

Upper Objective

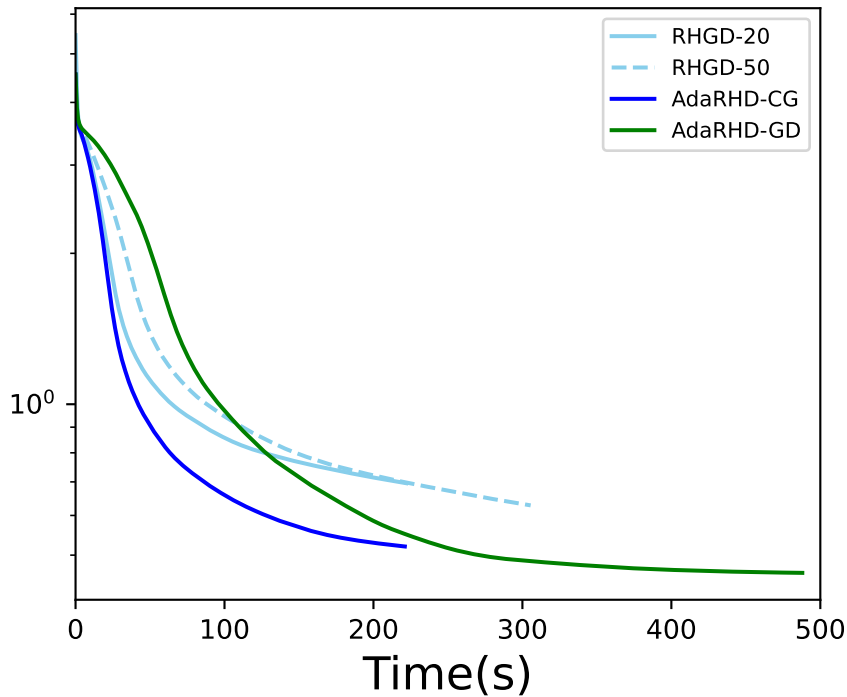

Supplement: supplementary_material [file shallow_hyrep_1000_50_10_upper_obj_time.pdf › AdaRHD-main/fig/shallow_hyrep_1000_50_10_upper_obj_time.pdf]

Hypergrad error

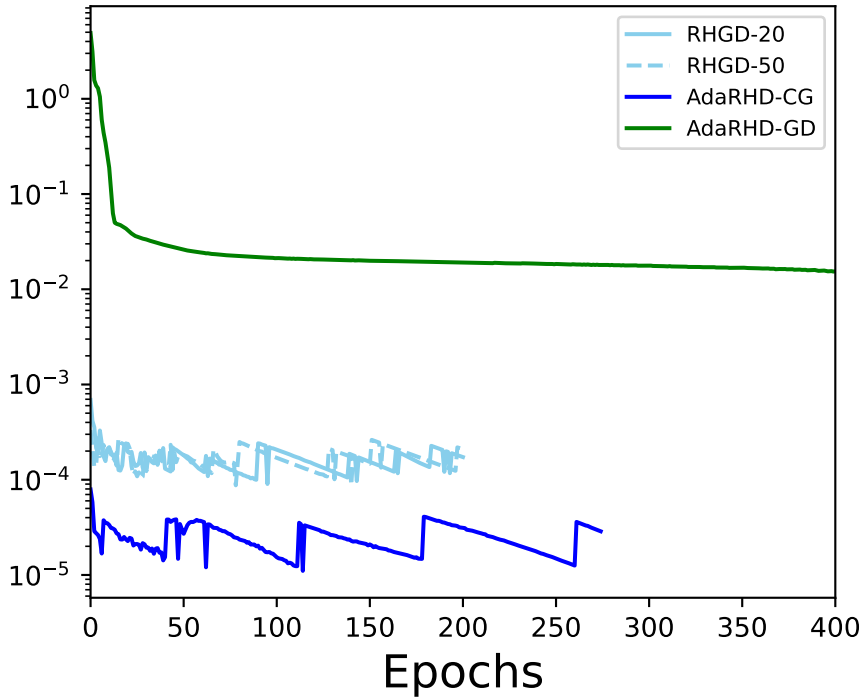

Supplement: supplementary_material [file shallow_hyrep_200_50_10_hypergrad_error.pdf › AdaRHD-main/fig/shallow_hyrep_200_50_10_hypergrad_error.pdf]

Upper Objective

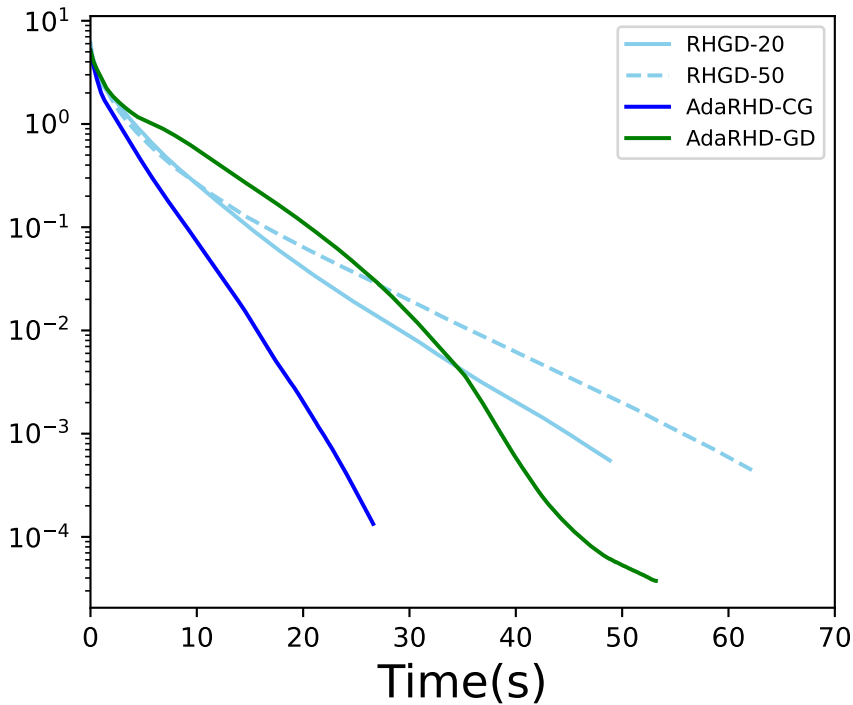

Supplement: supplementary_material [file shallow_hyrep_200_50_10_upper_obj_time.pdf › AdaRHD-main/fig/shallow_hyrep_200_50_10_upper_obj_time.pdf]

Hypergrad error

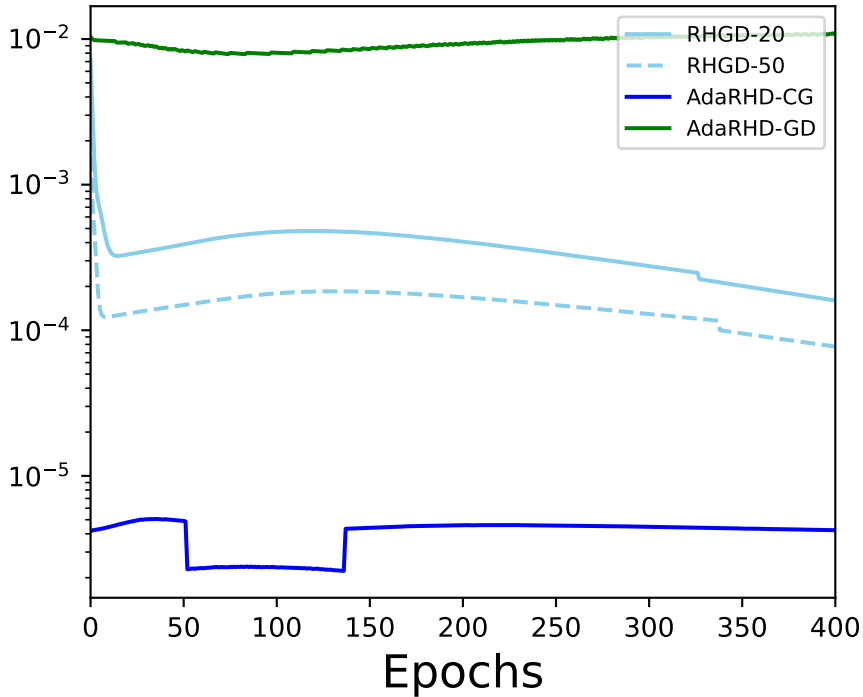

Supplement: supplementary_material [file simple_1000_50_20_hypergrad_error.pdf › AdaRHD-main/fig/simple_1000_50_20_hypergrad_error.pdf]

Upper Objective

0.20  
0.15  
0.10  
0.05  
0.00

0

5

10

15

20

25

Time(s)

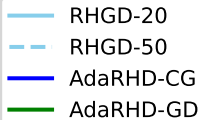

Supplement: supplementary_material [file simple_1000_50_20_upper_obj_time.pdf › AdaRHD-main/fig/simple_1000_50_20_upper_obj_time.pdf]

Hypergrad error

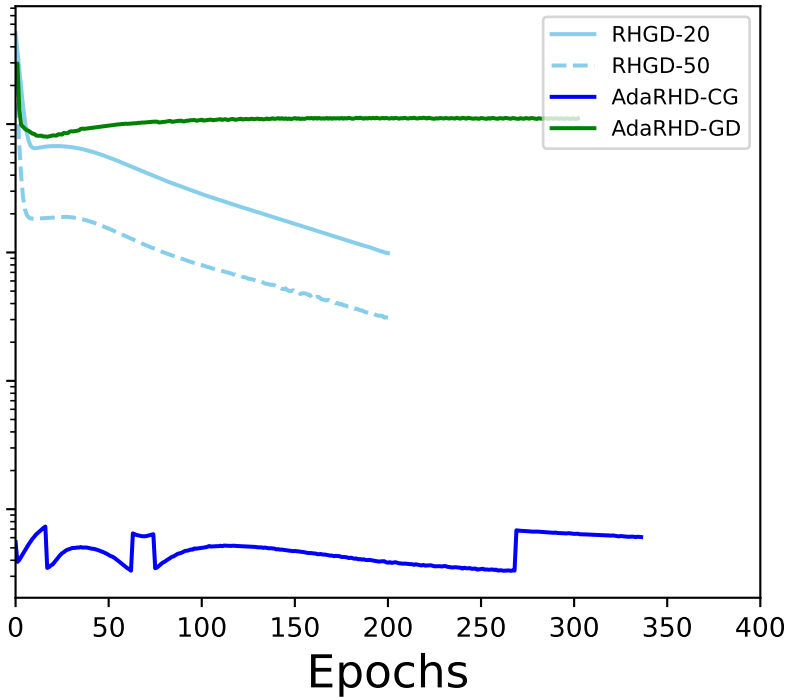

Supplement: supplementary_material [file simple_100_50_20_hypergrad_error.pdf › AdaRHD-main/fig/simple_100_50_20_hypergrad_error.pdf]

Upper Objective

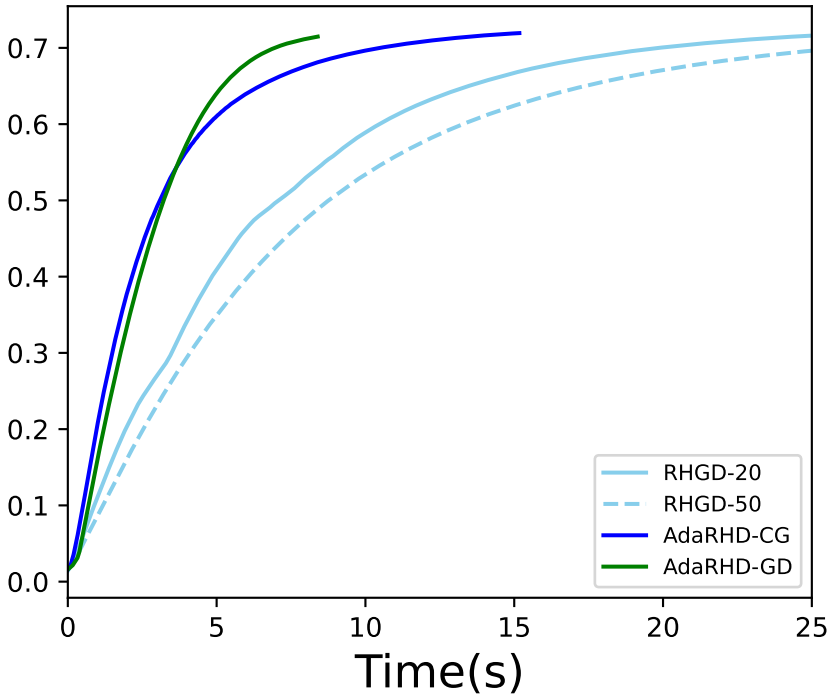

Supplement: supplementary_material [file simple_100_50_20_upper_obj_time.pdf › AdaRHD-main/fig/simple_100_50_20_upper_obj_time.pdf]
